# Supplementary material
Source: HighWire-hosted journal article supplement (https://hw-f5-jim.highwire.org/content/64/7/1172)
Supplement: inline-supplementary-material-2 [file inline-supplementary-material-2.pdf]

**Supplemental Figure 1.** ROC curve for the predictive model. The model included 14 specific variables as follows: gender, admitting source, primary service, admitting diagnosis, history of CHF, paralysis, hypothyroidism, HIV, cancer, collagen vascular diseases, coagulopathy, SBP, anion gap and albumin. As shown in Figure 1, because some patients were missing specific laboratory data, the regression model included 170 case and 346 control patients.

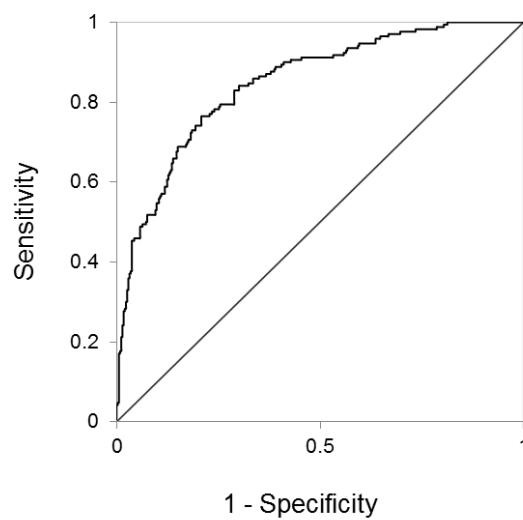

Supplemental Figure 1. Walsh, et al
